# Supplementary material
Source: HighWire-hosted journal article supplement (https://bmjopen.bmj.com/content/9/7/e029187)

## Schematic representation of the trial's timelines

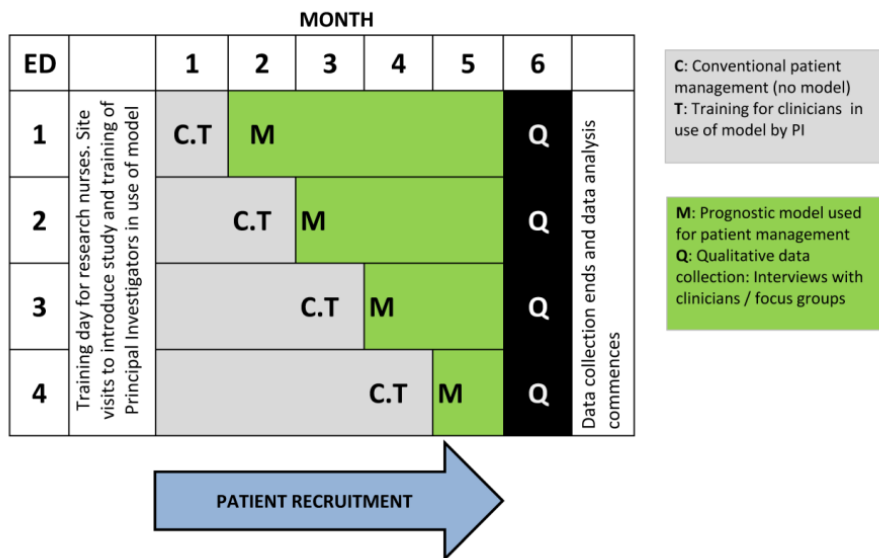

Supplement: inline-supplementary-material-1 [file inline-supplementary-material-1.pdf]
